# Supplementary material
Source: PubMed Central journal article supplement (PMC6953177)
Supplement: NIHMS1545834-supplement-1.pdf [file NIHMS1545834-supplement-1.pdf]

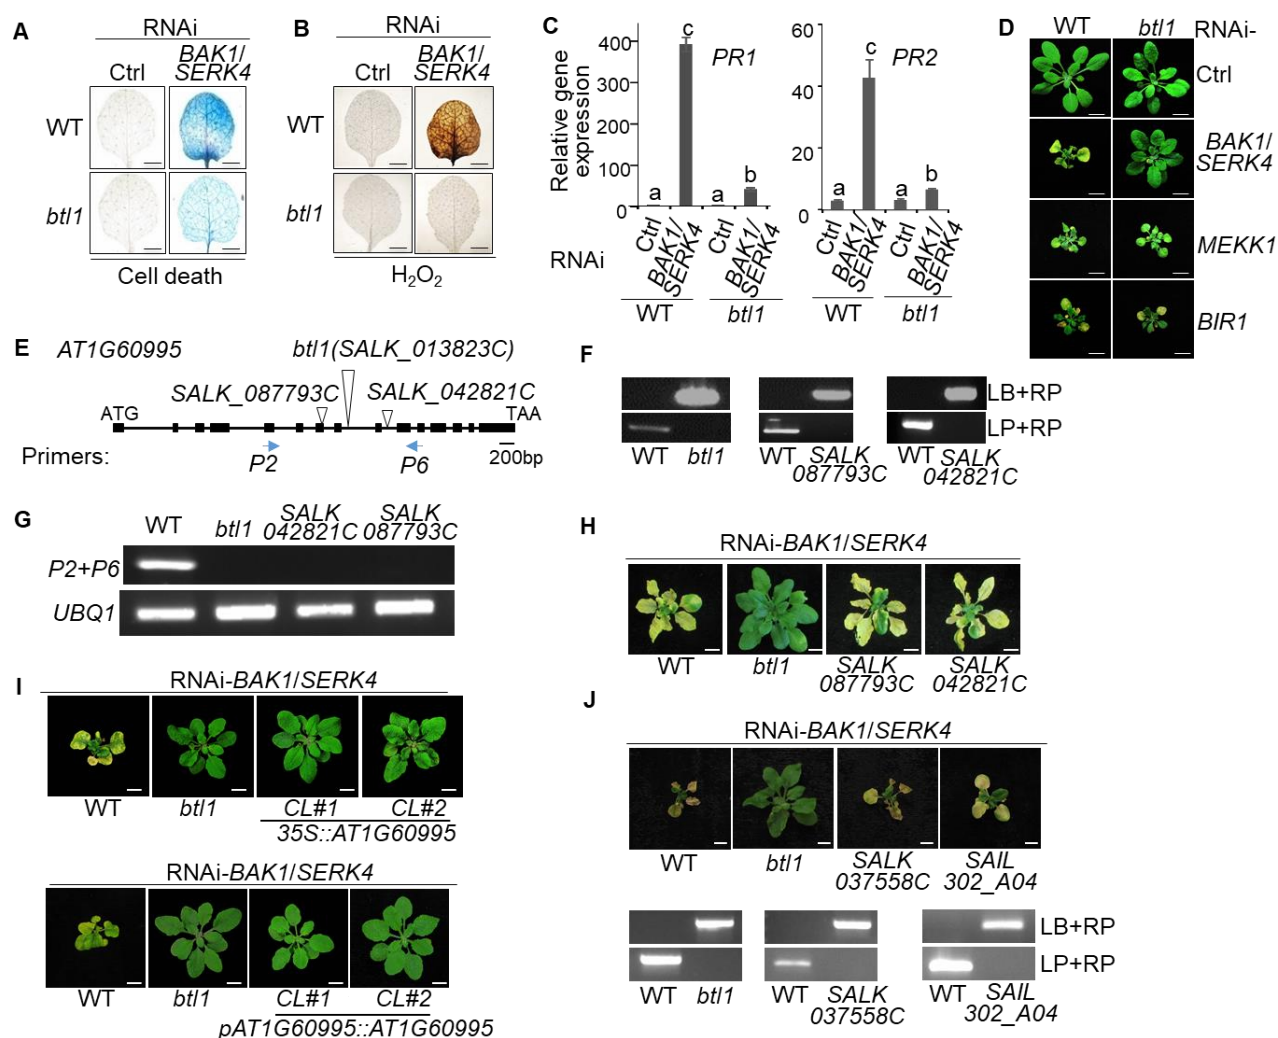

**Figure S1. RNAi-based genetic screen identified *btl1* specifically suppressing *BAK1/SERK4*-mediated cell death. Related to Figure 1.**

(A) The *btl1* mutant suppresses cell death triggered by RNAi-*BAK1/SERK4*. True leaves of WT (Col-0) and *btl1* after VIGS of *BAK1/SERK4* or a vector control were stained with trypan blue for cell death. Bar=2 mm.

(B) The *btl1* mutant suppresses  $H_2O_2$  production triggered by RNAi-*BAK1/SERK4*. True leaves of WT and *btl1* after VIGS of *BAK1/SERK4* or a vector control were stained with DAB for  $H_2O_2$  accumulation. Bar=2 mm.

(C) The *btl1* mutant suppresses *PR1* and *PR2* expression triggered by RNAi-*BAK1/SERK4*. The expression of *PR1* and *PR2* was normalized to the expression of *UBQ10*. The data are shown as

mean  $\pm$  SE from three independent repeats. The different letters denote statistically significant difference according to one-way ANOVA followed by Tukey test ( $p < 0.05$ ).

(D) The *btl1* mutant does not suppress cell death triggered by RNAi-*MEKK1* or RNAi-*BIR1*. Plant phenotypes are shown two weeks after VIGS of *BAK1/SERK4*, *MEKK1*, *BIR1* or a vector control (Ctrl). Bar=5mm.

(E) Scheme of *AT1G60995* with annotated T-DNA insertion sites in different SALK line mutants. Solid bars indicate exons and lines indicate introns. Arrows indicate the primers used for RT-PCR analysis in G. Bar=200 bp.

(F) PCR confirmation of three T-DNA insertion mutants of *AT1G60995*. The genomic DNAs from WT, *btl1*, *SALK\_087793C* and *SALK\_042821C* were PCR-amplified to confirm all three lines are homozygous mutants for the annotated T-DNA insertions. The primer pair of LP and RP amplified the genomic DNA fragment of *AT1G60995* and the primer pair of LB and RP amplified the T-DNA insertions.

(G) RT-PCR confirmation of the T-DNA insertion mutants of *AT1G60995*. The cDNA fragments from WT, *btl1*, *SALK\_087793C* and *SALK\_042821C* were PCR-amplified with the indicated primers. *UBQ1* was used as an internal control.

(H) Unlike *btl1*, two independent alleles of T-DNA insertion mutants of *AT1G60995* do not suppress growth defects by RNAi-*BAK1/SERK4*. Plant phenotypes are shown from WT, *btl1*, *SALK\_087793C* and *SALK\_042821C* two weeks after VIGS of *BAK1/SERK4*. Bar=5 mm.

(I) Complementation of *btl1* with *AT1G60995* driven by the *35S* promoter (top panel) or the native promoter (bottom panel) does not restore growth defects by RNAi-*BAK1/SERK4*. Bar=5 mm.

(J) Unlike *btl1*, two independent T-DNA insertion alleles of *AT1G11020* do not suppress growth defects by RNAi-*BAK1/SERK4*. Plant phenotypes are shown from WT, *btl1*, *SALK\_037558C* and *SAIL\_302\_A04* two weeks after VIGS of *BAK1/SERK4*. Bar=5 mm. Genotyping PCR confirmation of T-DNA insertion in *SALK\_037558C* and *SAIL\_302\_A04* is shown on the bottom. The above experiments were repeated three times with similar results.

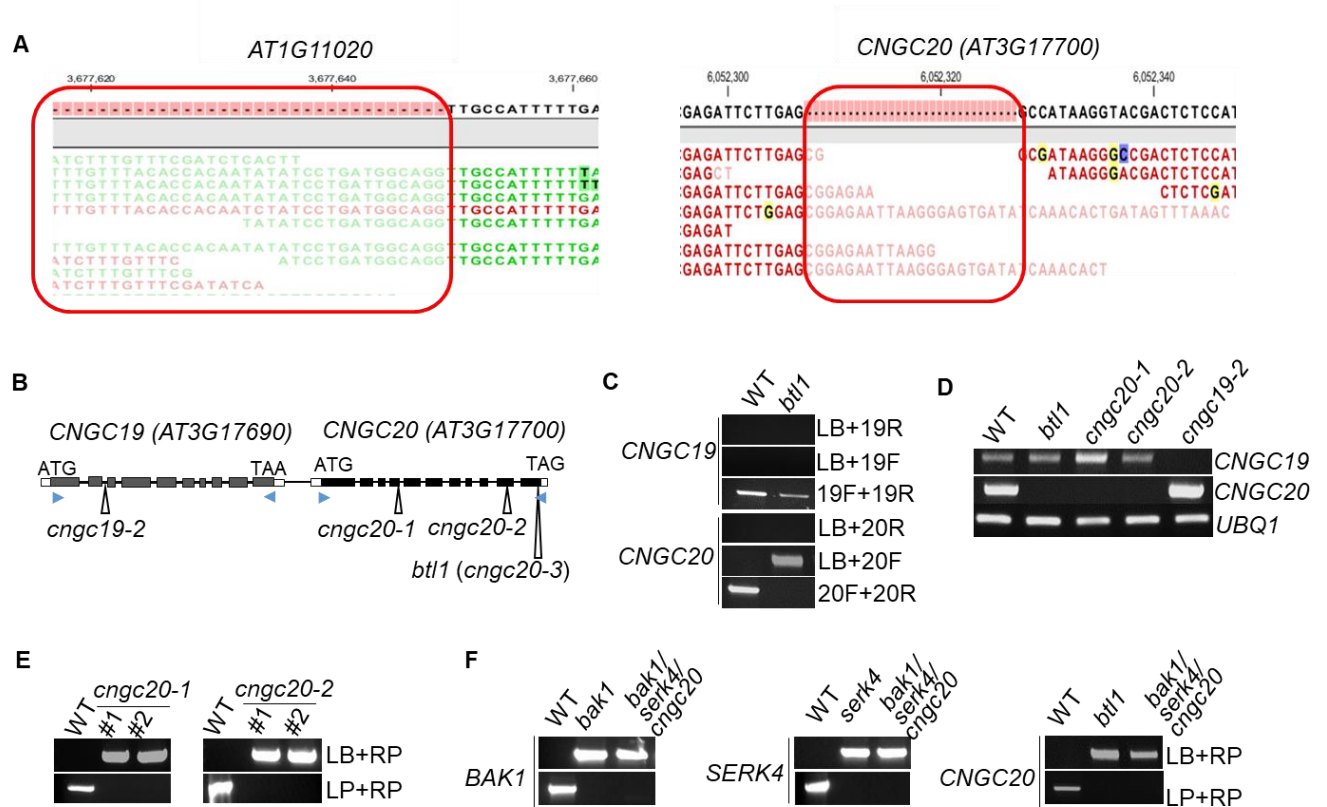

**Figure S2. Characterization of the T-DNA insertions in the *cngc20* mutants. Related to Figure 1.**

(A) Identification of T-DNA insertions in *AT1G11020* and *CNGC20* by whole genome sequencing analysis. Next-generation sequence reads of *btl1* are mapped and aligned to the genomic DNA sequence of *AT1G11020* and *CNGC20*, respectively. The red boxed regions indicate T-DNA fragments.

(B) Scheme of the *CNGC19* and *CNGC20* genes with annotated T-DNA insertion sites in *cngc19-2* (SALK\_007105), *cngc20-1* (SALK\_129133C), *cngc20-2* (SALK\_074919C) and *btl1 (cngc20-3)*. Solid bars indicate exons and lines indicate introns. Triangles indicate the T-DNA insertion sites. Arrows indicate the primers used for genotyping analysis.

(C) Genotyping PCR analysis to confirm that *btl1* carries a T-DNA insertion in *CNGC20* but not *CNGC19*. DNAs from WT and *btl1* were PCR-amplified with the indicated primers to confirm the T-DNA insertion.

(D) RT-PCR analysis of *CNGC20* and *CNGC19* expression in *btl1*, *cngc20-1*, *cngc20-2* and *cngc19-2*. The cDNAs of *CNGC19* or *CNGC20* from different plants were PCR-amplified. *UBQ1* was used as an internal control.

(E) Genotyping PCR analysis of the T-DNA insertions in *cngc20-1* and *cngc20-2*. DNAs from WT, *cngc20-1*, and *cngc20-2* were PCR-amplified with the indicated primers to confirm that the two lines used are homozygous for the T-DNA insertions.

(F) Genotyping PCR analysis of the *bak1-4/serk4-1/cngc20-3* triple mutant. Genomic DNAs from WT, *bak1-4*, *serk4-1*, *btl1(cngc20-3)*, and *bak1-4/serk4-1/cngc20-3* were PCR-amplified with specific primers to confirm that *bak1/serk4/cngc20* is a triple homozygous mutant.

The above experiments were repeated at least two times with similar results.

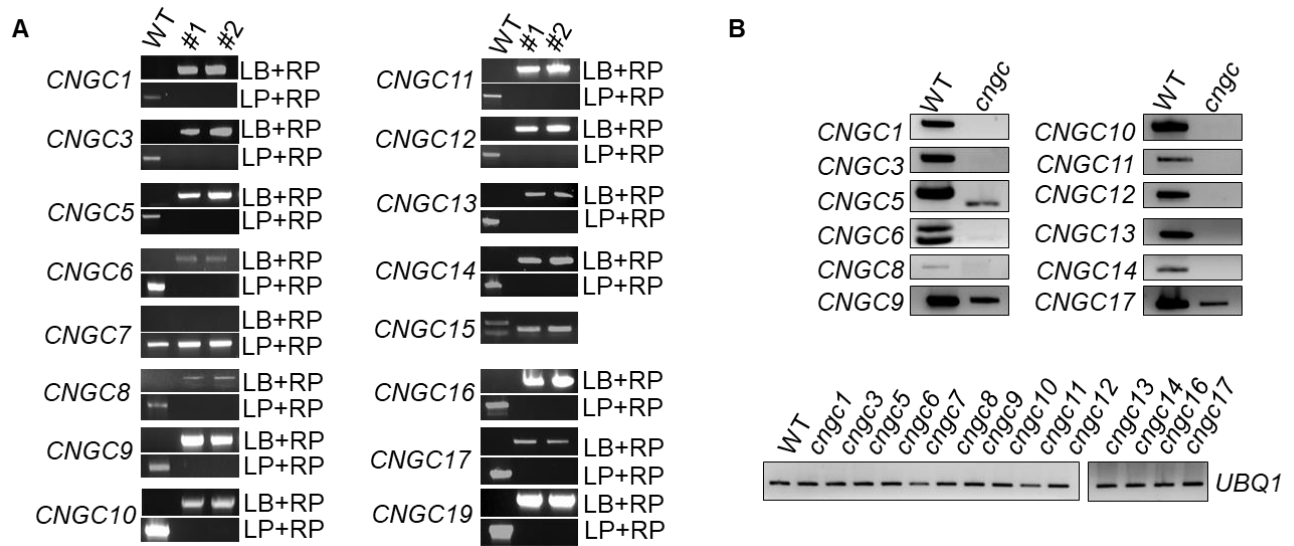

**Figure S3. Characterization of *cngc* mutants. Related to Figure 2.**

(A) Genotyping PCR analysis of *cngc* mutants. Genomic DNAs from WT and *cngc* mutants were PCR-amplified with the indicated primers to confirm that the lines used are homozygous except *cngc7*. #1 and #2 are two independent plant samples from each mutant. The genotyping for *cngc15* which bears a point mutation was performed by NlaIII digestion upon PCR-amplification.

(B) RT-PCR analysis of *CNGC* expression in *cngc* mutants. The cDNAs of *CNGCs* from WT and *cngc* mutants were PCR-amplified. *CNGC16* cannot be amplified from WT cDNA. *UBQ1* was used as an internal control.

The above experiments were repeated two times with similar results.

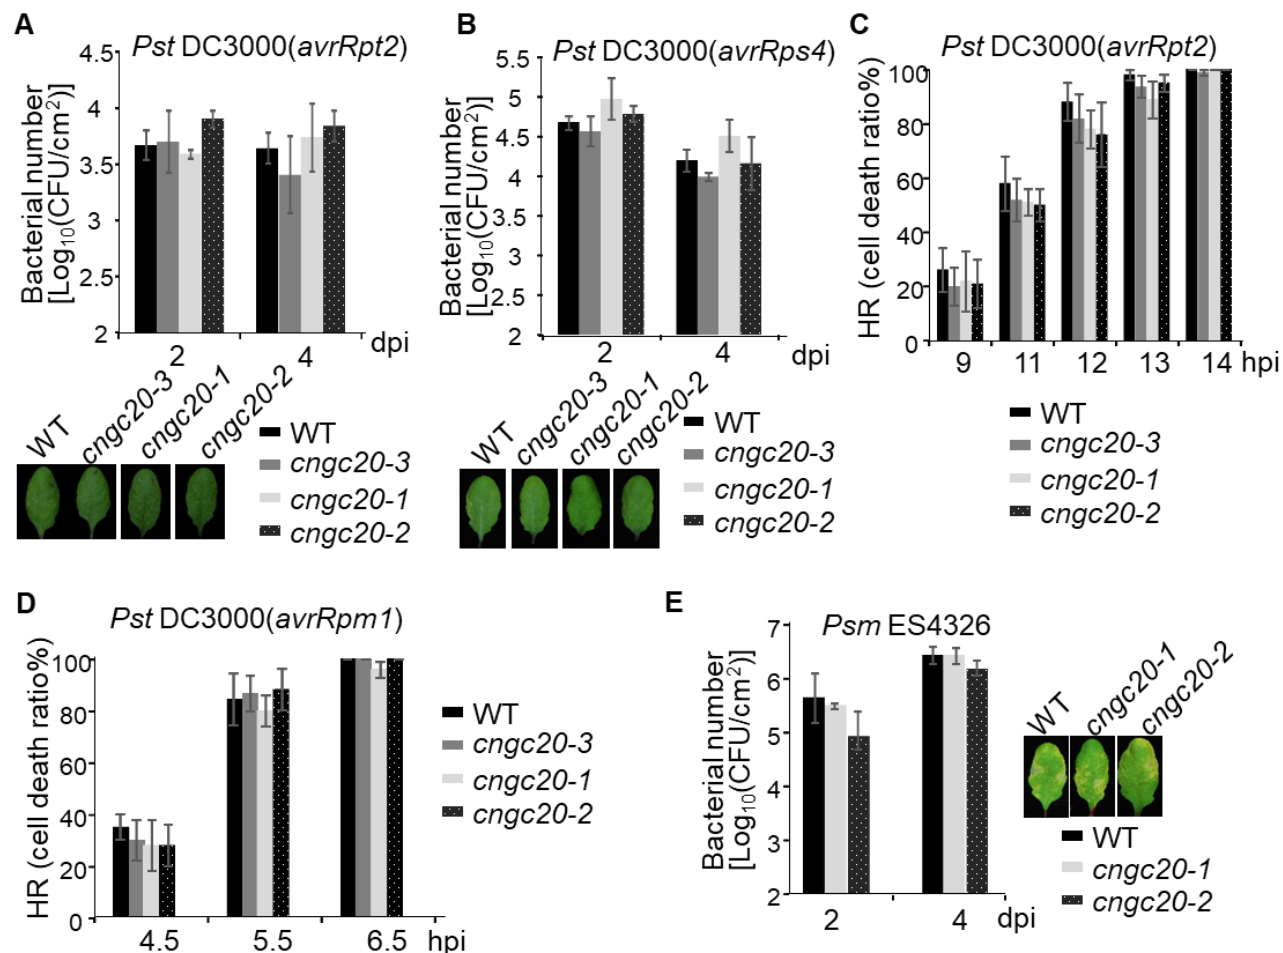

**Figure S4. Unaltered plant immune responses in the *cngc20* mutants. Related to Figure 2.**

(A and B) The *cngc20* mutants exhibit similar resistance to *Pst* DC3000 carrying *avrRpt2* (A) and *Pst* DC3000 carrying *avrRps4* (B) as WT plants. Four-week-old WT, *cngc20-3*, *cngc20-1* and *cngc20-2* plants were hand-inoculated with bacteria at  $\text{OD}_{600} = 5 \times 10^{-4}$ , and the bacterial counting was performed 2 and 4 days post-inoculation (dpi). The data are shown as mean  $\pm$  SE from three independent repeats. The disease symptom is shown at 4 dpi (bottom panel).

(C and D) Comparable HR in *cngc20* mutants and WT triggered by *Pst* DC3000 *avrRpt2* (C) and *Pst* DC3000 *avrRpm1* (D). Four-week-old plants were hand-inoculated with bacteria at  $\text{OD}_{600} = 0.1$ . HR was examined by counting the percentage of wilting leaves of total inoculated leaves ( $n=18$ ) at different time points after inoculation.

(E) The *cngc20* mutants exhibit similar resistance to *Psm* infection as WT plants. The assays were performed as (A) with *Psm*.

The above experiments were repeated three times with similar results.

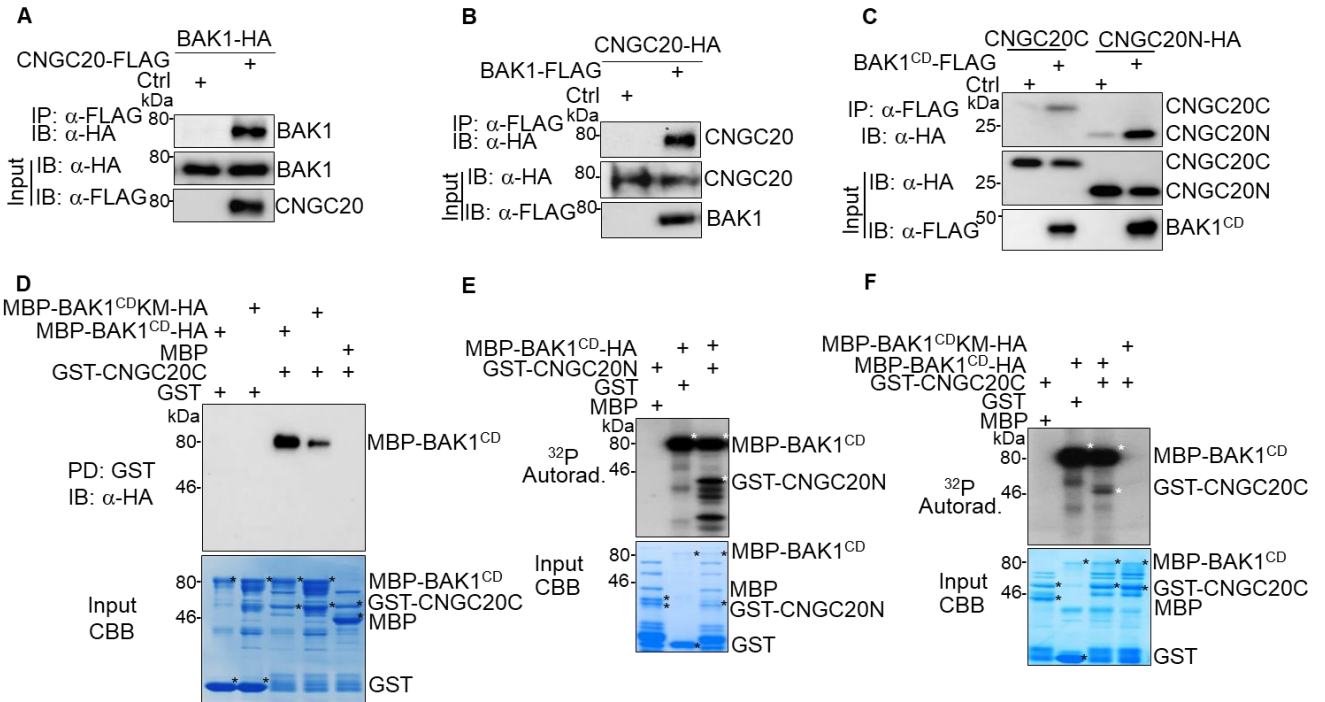

**Figure S5. BAK1 interacts with and phosphorylates CNGC20. Related to Figure 3 & 4.**

(A) CNGC20 associates with BAK1 in *Arabidopsis* protoplasts. CNGC20-FLAG and BAK1-HA were transiently co-expressed in *Arabidopsis* protoplasts. Protein extracts were immunoprecipitated with  $\alpha$ -FLAG agarose beads (IP:  $\alpha$ -FLAG) and immunoblotted with  $\alpha$ -HA antibody (IB:  $\alpha$ -HA) (top panel). The protein inputs are shown with immunoblotting before immunoprecipitation (bottom two panels).

(B) CNGC20 associates with BAK1 in *N. benthamiana*. CNGC20-HA and BAK1-FLAG were transiently co-expressed in *N. benthamiana* for Co-IP assay.

(C) Both CNGC20C and CNGC20N interact with BAK1<sup>CD</sup> in *Arabidopsis* protoplasts. BAK1<sup>CD</sup>-FLAG and CNGC20N-HA or CNGC20C-HA were transiently co-expressed in *Arabidopsis* protoplasts for Co-IP assay.

(D) The BAK1 kinase activity contributes to its interaction with CNGC20C. GST or GST-CNGC20C immobilized on glutathione sepharose beads was incubated with MBP, MBP-BAK1<sup>CD</sup>-HA or MBP-BAK1<sup>CD</sup>KM-HA proteins. The beads were washed and pelleted for immunoblotting analysis with  $\alpha$ -HA antibody (PD: GST; IB:  $\alpha$ -HA) (top panel). CBB staining of input proteins is shown on the bottom.

(E) BAK1 phosphorylates CNGC20N *in vitro*. The kinase assay was performed by incubating MBP or MBP-BAK1<sup>CD</sup>-HA with GST or GST-CNGC20N as a substrate. The phosphorylation of

CNGC20N by BAK1<sup>CD</sup> is shown with autoradiography (top panel). The protein loading control is shown by CBB (bottom panel).

(F) BAK1 phosphorylates CNGC20C *in vitro*. Similar assay using CNGC20C as a substrate was performed as in (E).

The above experiments were repeated three times with similar results.

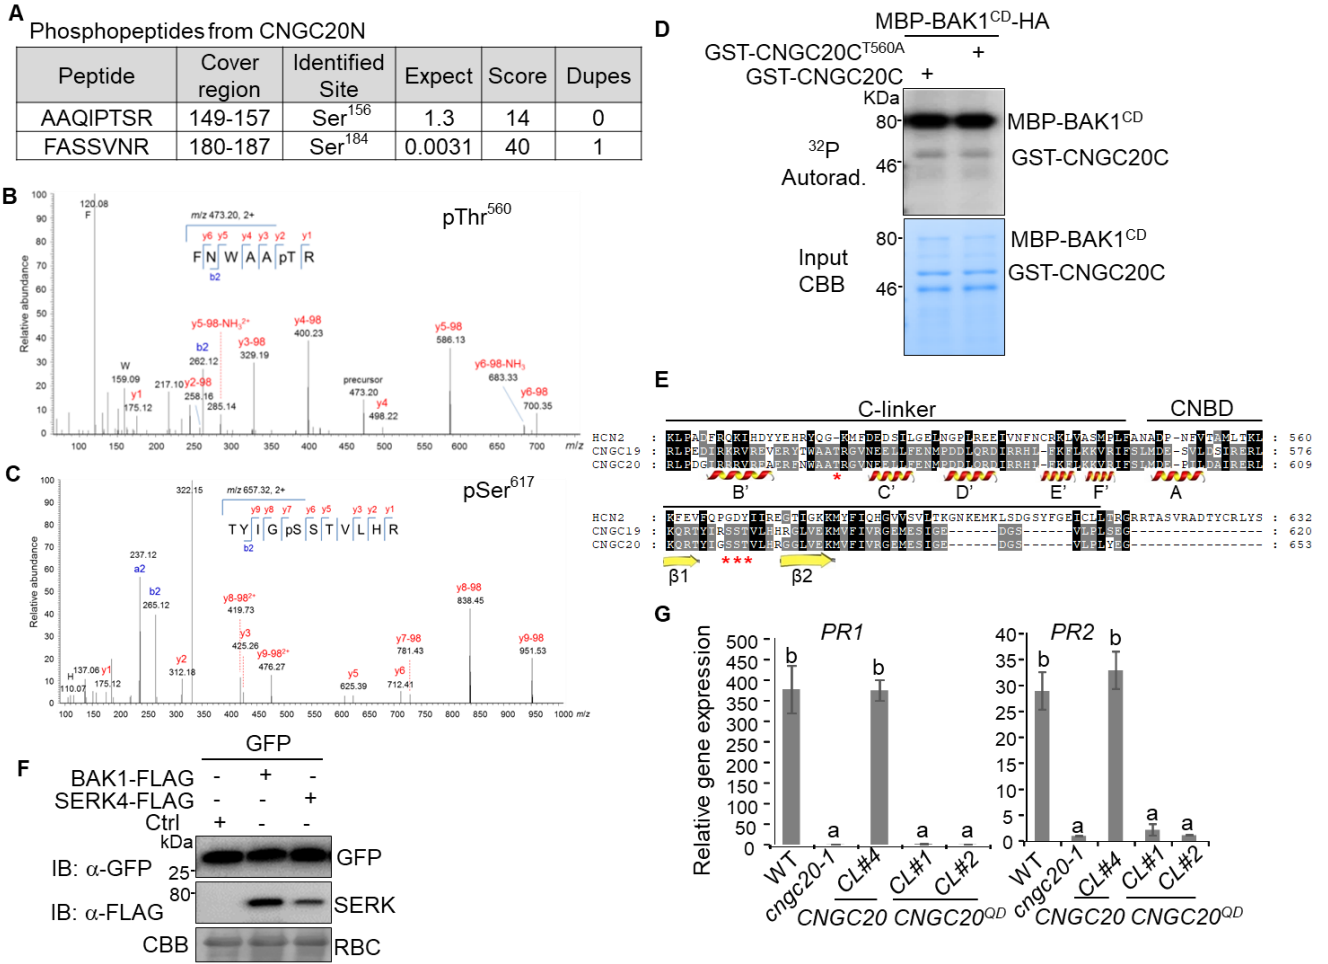

**Figure S6. LC-MS/MS analysis of *in vitro* phosphorylation of CNGC20N and CNGC20C by BAK1<sup>CD</sup>. Related to Figure 4.**

(A) Phosphorylation sites and the corresponding phosphopeptides from CNGC20N region identified from LC-MS/MS analysis.

(B and C) LC-MS/MS analysis reveals that Thr<sup>560</sup> (B) and Ser<sup>617</sup> (C) of CNGC20C were phosphorylated by BAK1<sup>CD</sup>.

(D) The phosphorylation of CNGC20C by BAK1<sup>CD</sup> is not affected by the T560A mutation of CNGC20C. The kinase assays were performed using CNGC20C, CNGC20C<sup>T560A</sup> proteins as substrates of BAK1<sup>CD</sup>. The CBB staining of input proteins is shown (bottom panel).

(E) Amino acid sequence alignment of the C-linker and cyclic nucleotide-binding domain (CNBD) among human CNGC protein HCN2, *Arabidopsis* CNGC19 and CNGC20. The secondary

structures for the  $\alpha$ -helix and  $\beta$ -sheet are labeled with letters. Red stars under the sequence indicate CNGC20 phosphorylation residues by BAK1.

(F) GFP protein accumulation is not affected by co-expression with BAK1 or SERK4. GFP was co-expressed with vector control (Ctrl), BAK1-FLAG or SERK4-FLAG in *Arabidopsis* protoplasts for 12 hr. Protein expression was analyzed with  $\alpha$ -GFP or  $\alpha$ -FLAG immunoblot.

(G) Complementation of *cngc20-1* with *CNGC20<sup>QD</sup>* does not induce *PR1* and *PR2* expression triggered by RNAi-*BAK1/SERK4*. CL#1 and CL#2 are two representative lines. CL#4 is WT *CNGC20* complementation control. The expression of *PR1* and *PR2* was normalized to the expression of *UBQ10*. The data are shown as mean  $\pm$  SD from two independent repeats. The different letters denote statistically significant difference according to one-way ANOVA followed by Tukey test ( $p < 0.05$ ).

The above experiments were repeated three times with similar results.

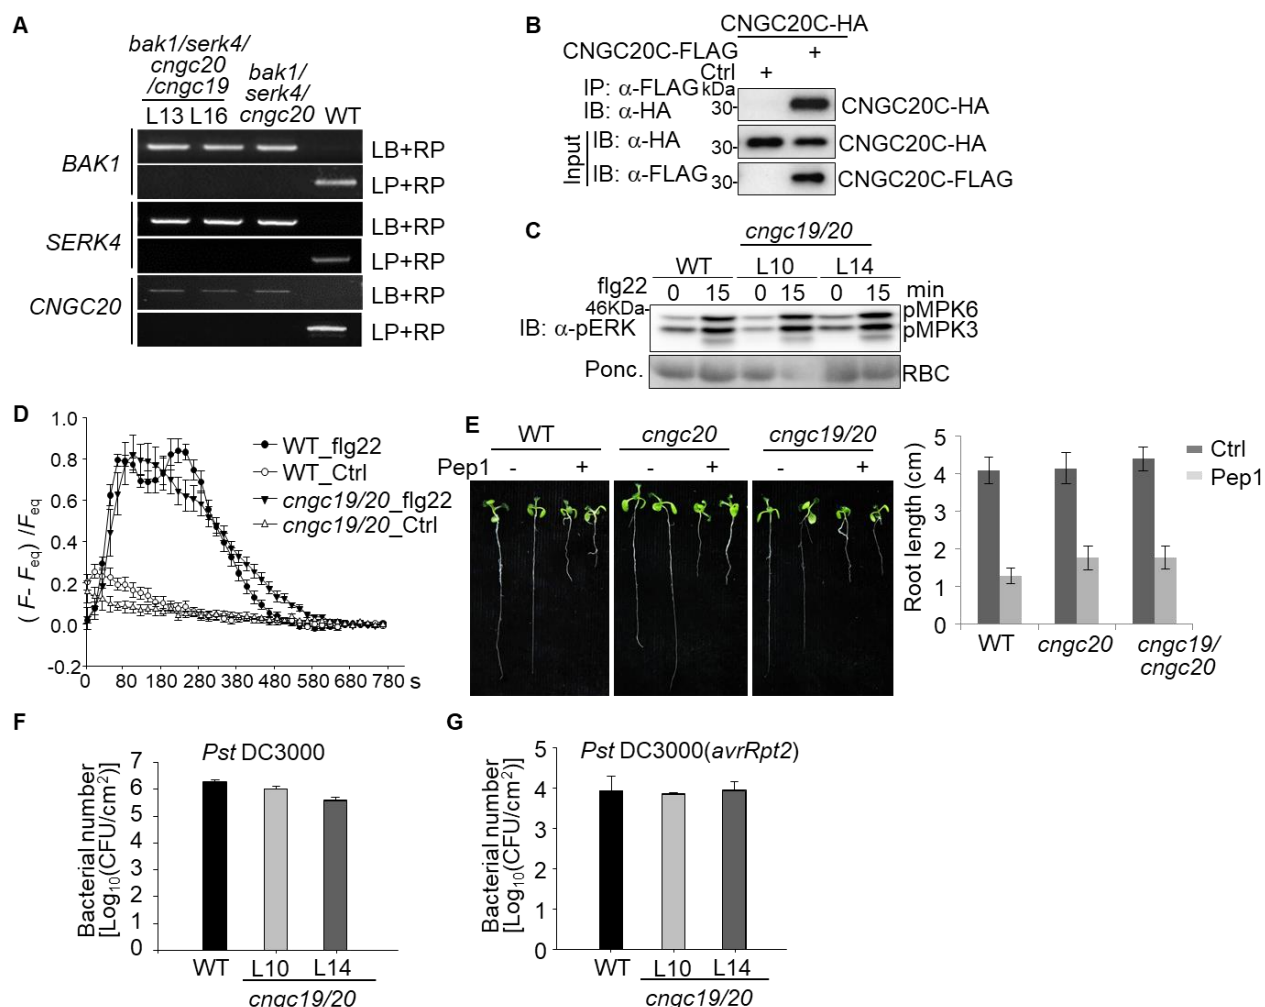

**Figure S7. Unaltered immune responses in the *cngc19/cngc20* mutants. Related to Figure 7.**

(A) Genotyping PCR analysis of the T-DNA insertions in *bak1/serk4/cngc20/cngc19* quadruple mutant. DNAs from WT, *bak1-4/serk4-1/cngc20-1*, and CRISPR/Cas9 *cngc19/bak1-4/serk4-1/cngc20-1* (line13 and line16) were PCR-amplified with specific primers.

(B) CNGC20C self-associates. CNGC20C-FLAG and CNGC20C-HA were transiently co-expressed in *Arabidopsis* protoplasts. Protein extracts were immunoprecipitated with  $\alpha$ -FLAG agarose beads (IP:  $\alpha$ -FLAG) and immunoblotted with  $\alpha$ -HA antibody (IB:  $\alpha$ -HA) (top panel). The protein inputs are shown with immunoblot before immunoprecipitation (bottom two panels).

(C) Comparable flg22-induced MAPK activation in the *cngc19/cngc20* mutant and WT. Ten-day-old seedlings were treated without or with 100 nM flg22 for 15 min. The MAPK activation was

analyzed by immunoblot with  $\alpha$ -pERK antibody (top panel), and the protein loading is shown by Ponceau S staining for RBC (bottom panel).

(D) The *cngc19/cngc20* mutants exhibit similar flg22-induced  $\text{Ca}^{2+}$  influx as WT. GCaMP3 was expressed in protoplasts from WT and *cngc19/cngc20-1* plants for 12 hr. The signal was measured upon 100 nM flg22 or ddH<sub>2</sub>O (Ctrl) treatment. The difference of absolute fluorescence values with the control value for each experiment was normalized to the control value as  $(F - F_{\text{eq}})/F_{\text{eq}}$  (where F was the measured fluorescence at a given time point and  $F_{\text{eq}}$  was the averaged measurement for the samples at the final resting time point measured). Averages of five replicates  $\pm$  SE are shown.

(E) The *cngc19/cngc20* mutants exhibit similar Pep1-induced seedling growth inhibition as WT. Four-day-old seedlings were transferred from  $\frac{1}{2}$ MS plate to liquid  $\frac{1}{2}$ MS medium supplemented without (black bar) or with (gray bar) 1  $\mu$ M Pep1 and grew for another 7 days. Averages of root length from eight seedlings are shown as mean  $\pm$  SD (left panel).

(F and G) The *cngc19/cngc20* mutants exhibit similar susceptibility as WT plants to *Pst* DC3000 (F) and *Pst* DC3000 *avrRpt2* (G). The bacterial counting was performed at 3 dpi.

The above experiments were repeated twice with similar results.

| Gene Locus       | Gene Identity                                 | T-DNA Insertion Position in <i>btl1</i> | Additional T-DNA lines analyzed                   |
|------------------|-----------------------------------------------|-----------------------------------------|---------------------------------------------------|
| <i>AT1G60995</i> | Unknown protein, containing membralin domain  | 8 <sup>th</sup> intron                  | SALK_087793C<br>(T-DNA in 7 <sup>th</sup> exon)   |
|                  |                                               |                                         | SALK_042821C<br>(T-DNA in 9 <sup>th</sup> intron) |
| <i>AT1G11020</i> | RING/FYVE/PHD zinc finger superfamily protein | 1 <sup>st</sup> intron                  | SALK_037558C<br>(T-DNA in 1 <sup>st</sup> intron) |
|                  |                                               |                                         | SAIL_302_A04<br>(T-DNA in 1 <sup>st</sup> intron) |
| <i>AT3G17700</i> | <i>CNGC20</i>                                 | 11 <sup>th</sup> exon                   | SALK_129133C<br>(T-DNA in 4 <sup>th</sup> exon)   |
|                  |                                               |                                         | SALK_074919C<br>(T-DNA in 10 <sup>th</sup> exon)  |

**Table S1. T-DNA insertions identified from the whole genome-sequence analysis of the *btl1* (*SALK\_013823C*) mutant. Related to Figure 1.**

ATGGCTTCCCACAACGAAAACGATGATATTCCCATGCTTCCGATTTTCAGACCCATCA  
TCTCGTACTAGAGCCAGAGCTTTCACCTCCAGGAGTCGTAGCGTTTCTCTCTCAAACC  
CTACTTCCTCCATTGAAGGATTTGACACTTCCACTGTGGTTTTAGGCTACACGGGTCC  
TCTTCGAACTCAGAGACGTCCTCCTTTAGTTCAAATGAGTGGTCCTCTTACCTCTACT  
CGCAAGCATGAACCTCTCTTTCTTCCTCATCCTTCTTCTGATTCCGTTGGTGTCTCTTC  
TCAGCCTGAGAGGTATCCTTCTTTTGCTGCTCTTGAACATAAAAACTCCTCAGAGGA  
TGAGTTCGTTTTGAAACACGCAAATCTCTTGAGGTCTGGACAATTGGGAATGTGTAA  
TGATCCTTACTGTACTACTTGCCCTTCTTACTACAACCGTAAGGCTGCTCAAATCCCT  
ACTTCTAGAGTTTTCTGCCCTTTTTGATTCCACGgtaaagtttgattttgttactttacattcacaaatatagctca  
ggatcaagtaaatgtcgttgaaacagagcttttgtttcttgcctagTTCCATAACGCTCTGTATGATGATGCTAAA  
GGTTGGGCAAGGAGATTTGCTTCCTCTGTAAATAGATACTTACCTGGAATCATGAAT  
CCTCATGCCAAAGAGGTTCAAACCTGGACTAAATTCTTCGCCCTTTCATGCTTGTTAG  
CTATTTTTATAGATCCCCTCTTCTTCTTCCTCATAAAAGTCCAAGAGgtatgttttccttcagaga  
tatcttttgcctttccaagtgttttatcttgcctttacaccaccttttgaccatctttattttctactgtagCAAAACAAATGTATTA  
TGATTGATTGGCCGATGACTAAAGCATTGTAGCTGTAAGAAGTGTAACAGATGTTA  
TATTCATATGAACATTCTACTTCAGgtgcttttctttgcttacattttccatctctttataaaciaaatatgttgcttta  
gtgctcacgtttgccatattggtgcagTTCCGATTGGCCTATGTAGCTCGTGAGTCTACGGTAGTTGG  
AGCTGGCCAGTTAGTTAGTCATCCCAAAAAAATTGCCCTTCATTACCTCAAAGGAAA  
GTTTTTCCTTGACTTGTTTCATAGTGATGCCACTTCCACAGgtattgttacgttagagctcctactggttta  
agtaatgtaatacagaagatgttcatttatgtttctttgtttacagATATTGATACTATGGATAATACCAGCACAT  
TTGGGTGCATCCGGGGCAAACCTATGCGAAAAACCTTCTACGAGCTGCAGTTCTTTTC  
CAATACATTCCAAAGTTATATAGACTTCTACCGTTTCTTGCTGGACAAACACCTACC  
GGATTCATATTTGAGTCAGCTTGGGCTAATTTTGTTATTAATCTTCTCACTTTCATGC  
TTGCTGGACATGTTGTTGGTTCTTGCTGGTATCTATTTGGTCTGCAGgtatgacaaactctcaaa  
atgtctttcattttatcttgcctgatcagcagaagatgcataaagtatttatattgtttccggttttctgttggtctttcagAGAGTTAAT  
CAGTGCCTTCGAAATGCTTGCGGTAATTTTGCGCGTGAATGTCAAGATCTTATAGAT  
TGTGGTAATGGAAATAGCAGTGTATTAGTACGAGCTACCTGGAAAGATAATGCGAG  
TGCCAATGCTTGTTTCCAAGAAGATGGTTTTCTTATGGAATCTATTTAAAAGCAGTC  
AATCTTACCAATCATTCTAATCTCTTCACAAGATACAGTTACTCTCTCTTCTGGGGCT  
TCCAGgtaaactgttttttttctctctttcagtttttagtaggaaactaagaacaactactcaactactttgcattgattggcactactggaact  
cttcattaagatcattaattttataattctcatagCAAATCAGCACTCTTGCTGGCAACCAAGTCCCAAGCTA  
CTTTCTAGGGGAGGTCTTCTTTACTATGGGTATCATTGGACTAGGGCTTTTACTTTTT  
GCGCTTCTTATTGGTAATATGCAAAATTTCTTCAAGCTCTTGTTAAAAGgtaaacaattcca  
tcattgtactaaaatagatatttcaagacataatggttggttctataaactaactactcaggtgattgtgtttgtccatattagGAATTTG  
GAAATGACGCTGAGACGGCGTGATGTGGAGCAATGGATGAGCCATAGACGGTTGCC  
AGATGGTATAAGAAAGgtatgtggactttgcctataaaactttgtttatccttgaatattcttttctaaagagttacattggtctca  
gtttcagtagtttactattaaactaactgaataatggttcgacattatcagGAGGGTGCGAGAGGCTGAGCGGTTTA  
ACTGGGCTGCTACTAGAGGCGTTAACGAAGAATTGCTTTTTGAGAATATGCCTGATG  
ATCTTCAAAGAGATATAAGACGACACCTCTTCAAATTTCTCAAGAAGgtaaacatatgtgaaa  
cttctgtatgcatagatcccaattccatatagtgttgcaaaagactagttctagaagctgtaactgcaagtaatagtagagaccacagattaaa  
ccattgctgagaaatagtattgaaattgaatgggtttgcagGTGAGAATATTTTCGTTGATGGATGAACCAAT  
CTTAGATGCAATCCGTGAGAGGCTGAAACAGAGGACATACATAGGGAGTAGCACAG  
TGTTGCACCGTGGAGGACTAGTTGAGAAAATGGTATTCATAGTGAGAGGTGAGATG  
GAGAGCATTGGAGAAGATGGTTCTGTTCTTCCATTATATGAAGGCGATGTTTGTGGT  
GAAGAACTCCTCACTTGGTGCCTCGAACGCTCTTCTGTAAACCCCGgtaccatcccttttactct  
atctctatgtgttcataaatcccaaaaagtttggttccttagatgacacttcgttaagaaaagcttggaactgagtatgttctgaaaccttcag

ATGGGACGAGGATAAGGATGCCATCAAAGGGATTGCTTAGTAGCAGAAATGTAAGG  
TGTGTGACAAATGTGGAGGCGTTTTTCGCTGAGTGTAGCCGATCTGGAAGACGTAACG  
AGCTTGTTTTTCGAGATTCTTGAG**GAGT**CATAGAGTCCAAGGAGCCATAAGGTACGA  
CTCTCCATATTGGAGGCTACGAGCGGCTAGGCAGATTCAAGTGGCGTGGAGATACC  
GTAGGAGACGGCTTCATAGATTATGCACTCCTCAGTCTAGTTATAGCCTT**TAG**

**Table S2. Sequence of *CNGC20* with the T-DNA insertion site underlined in the *btl1* (*cngc20-3*) mutant. Related to Figure 1.**

**Note:** The start codon (ATG) and stop codon (TAG) are in bold. The capital letters denote exons while the small letters indicate introns. GAGT, which are in bold and underlined, bears a T-DNA insertion based on the whole genome-sequence analysis of *btl1*. This was further confirmed by targeted Sanger-sequence analysis of this region.

| <b>CNGCs</b>  | <b>Gene Locus</b> | <b>Salk Line Number</b> | <b>T-DNA Insertion Position</b> |
|---------------|-------------------|-------------------------|---------------------------------|
| <i>CNGC1</i>  | <i>AT5G53130</i>  | SAIL_443_B11            | 4 <sup>th</sup> exon            |
| <i>CNGC2</i>  | <i>AT5G15410</i>  | <i>dnd1-1</i>           | Trp <sub>290</sub> →stop codon  |
| <i>CNGC3</i>  | <i>AT2G46430</i>  | SALK_056832C            | 3 <sup>rd</sup> exon            |
| <i>CNGC4</i>  | <i>AT5G54250</i>  | <i>dnd2-1</i>           | Trp <sub>89</sub> →stop codon   |
| <i>CNGC5</i>  | <i>AT5G57940</i>  | SALK_149893C            | 5 <sup>th</sup> exon            |
| <i>CNGC6</i>  | <i>AT2G23980</i>  | SALK_042207             | 2 <sup>nd</sup> intron          |
| <i>CNGC7</i>  | <i>AT1G15990</i>  | SALK_060871C            | 1 <sup>st</sup> exon            |
| <i>CNGC8</i>  | <i>AT1G19780</i>  | GABI_101C03             | 4 <sup>th</sup> intron          |
| <i>CNGC9</i>  | <i>AT4G30560</i>  | SALK_026086             | 5 <sup>th</sup> intron          |
| <i>CNGC10</i> | <i>AT1G01340</i>  | SALK_015952C            | 7 <sup>th</sup> exon            |
| <i>CNGC11</i> | <i>AT2G46440</i>  | SALK_026568C            | 7 <sup>th</sup> intron          |
| <i>CNGC12</i> | <i>AT2G46450</i>  | SALK_092657             | 5 <sup>th</sup> exon            |
| <i>CNGC13</i> | <i>AT4G01010</i>  | SALK_060826             | 3 <sup>rd</sup> exon            |
| <i>CNGC14</i> | <i>AT2G24610</i>  | WiscDsLox437E09         | 2 <sup>nd</sup> exon            |
| <i>CNGC15</i> | <i>AT2G28260</i>  | CS93507                 | point mutation                  |
| <i>CNGC16</i> | <i>AT3G48010</i>  | SAIL_726_B04            | 3 <sup>rd</sup> exon            |
| <i>CNGC17</i> | <i>AT4G30360</i>  | SALK_041923             | 5 <sup>th</sup> exon            |
| <i>CNGC19</i> | <i>AT3G17690</i>  | SALK_007105             | 2 <sup>nd</sup> intron          |
| <i>CNGC20</i> | <i>AT3G17700</i>  | SALK_129133C            | 4 <sup>th</sup> exon            |
| <i>CNGC20</i> | <i>AT3G17700</i>  | SALK_074919C            | 10 <sup>th</sup> exon           |

**Table S3. T-DNA insertion mutants of *CNGC* family members. Related to Figure 2.**
